# Supplementary material for: A sensitive and efficient method for the determination of 8 chlorophenoxy acid herbicides in crops by dispersive liquid–liquid microextraction and HPLC with fluorescence detection and identification by MS
Source: Royal Society of Chemistry journal article supplement (doi:10.1039/c5ay03412d), 2016-01-01
Supplement: c5ay03412d1.pdf [file c5ay03412d1.pdf]

**Table S1**

**The experimental data for the peak areas of eight CPAHs obtained from Box–Behnken design DLLME conditions (n = 3).**

| Number | Factor                    |                          |                 | Peak Area |       |      |        |      |        |      |          | Total |
|--------|---------------------------|--------------------------|-----------------|-----------|-------|------|--------|------|--------|------|----------|-------|
|        | Extraction solvent volume | Disperser solvent volume | Extraction time | CPA       | 2,4-D | MCPA | 2,4-DP | MCPP | 2,4-DB | MCPB | Diclofop |       |
| 1      | 140                       | 1                        | 2               | 4.7       | 4.6   | 6.9  | 10.1   | 13.7 | 22.2   | 23.3 | 16.7     | 102.2 |
| 2      | 100                       | 0.5                      | 2               | 5.8       | 1.9   | 5    | 6.3    | 7.6  | 12     | 13.2 | 9.4      | 61.2  |
| 3      | 60                        | 1                        | 5               | 4.9       | 2.1   | 3    | 5.9    | 6.9  | 13.2   | 10.3 | 7.9      | 54.2  |
| 4      | 60                        | 0.5                      | 3.5             | 5         | 2.8   | 3.4  | 6.2    | 8.7  | 8.8    | 9.4  | 8.5      | 52.8  |
| 5      | 140                       | 0.5                      | 3.5             | 5.3       | 3.5   | 12.4 | 8.7    | 17   | 26     | 28   | 27       | 127.9 |
| 6      | 100                       | 1                        | 3.5             | 8.8       | 7.9   | 10   | 12     | 17.8 | 22.2   | 23.4 | 30.7     | 132.8 |
| 7      | 60                        | 1                        | 2               | 5         | 2.3   | 3    | 5.9    | 7.3  | 12.6   | 11.8 | 11.1     | 59    |
| 8      | 140                       | 1                        | 5               | 4.5       | 4.1   | 5.7  | 7.8    | 11   | 20     | 19   | 14       | 86.1  |
| 9      | 140                       | 1.5                      | 3.5             | 5.9       | 3     | 3.8  | 8.4    | 12   | 19.9   | 21   | 15.8     | 70.1  |
| 10     | 100                       | 1                        | 3.5             | 9         | 9.2   | 11   | 15.7   | 23   | 24     | 25.3 | 27.1     | 146.6 |
| 11     | 100                       | 1                        | 3.5             | 9.6       | 9.7   | 12.7 | 17.1   | 21.2 | 25.4   | 26   | 26       | 147.7 |
| 12     | 100                       | 1                        | 3.5             | 8.7       | 9.6   | 11.8 | 16.1   | 21.7 | 23.4   | 24.8 | 24.9     | 141   |
| 13     | 100                       | 0.5                      | 5               | 3         | 2.1   | 3.1  | 6.8    | 7.8  | 14     | 14   | 11.4     | 62.2  |
| 14     | 100                       | 1                        | 3.5             | 7.7       | 9.8   | 12.5 | 17     | 21.6 | 25.9   | 26.6 | 28.1     | 149.6 |
| 15     | 100                       | 1.5                      | 5               | 2.8       | 3     | 6.7  | 6.9    | 8.2  | 13.2   | 14.5 | 10       | 65.3  |
| 16     | 60                        | 1.5                      | 3.5             | 3         | 1.5   | 5.6  | 5.4    | 6    | 10.2   | 11.3 | 8.1      | 51.1  |
| 17     | 100                       | 1.5                      | 2               | 3.5       | 2.8   | 3    | 7.4    | 11.1 | 14     | 13.2 | 12.4     | 67.2  |

**Table S2**

**The experimental data for the peak areas of eight CPAHs obtained from Box–Behnken design derivatization conditions (n = 3).**

| umber | Factor         |                |                |                | Peak Area |       |      |        |      |        |       |          |       | Total |
|-------|----------------|----------------|----------------|----------------|-----------|-------|------|--------|------|--------|-------|----------|-------|-------|
|       | T <sup>1</sup> | t <sup>2</sup> | C <sup>3</sup> | R <sup>4</sup> | CPA       | 2,4-D | MCPA | 2,4-DP | MCPP | 2,4-DB | MCPB  | Diclofop |       |       |
| 1     | 100            | 15             | 12             | 6              | 25.4      | 24.9  | 33.2 | 26.3   | 65.6 | 67.9   | 99.1  | 41.6     | 384   |       |
| 2     | 85             | 10             | 20             | 10             | 11        | 11.3  | 15.5 | 12.8   | 33.2 | 40.4   | 56.4  | 21.6     | 202.2 |       |
| 3     | 100            | 5              | 12             | 6              | 11.5      | 11.7  | 15.6 | 12.4   | 31.8 | 38.7   | 55.8  | 20.7     | 160.2 |       |
| 4     | 85             | 5              | 12             | 2              | 1.9       | 1.9   | 2.7  | 2      | 7.8  | 9.2    | 13.1  | 9.8      | 48.4  |       |
| 5     | 85             | 15             | 20             | 6              | 9.2       | 9.6   | 13.3 | 11.7   | 30.2 | 35.5   | 49.9  | 19.3     | 178.7 |       |
| 6     | 85             | 10             | 12             | 6              | 33.5      | 31.2  | 45.4 | 35.7   | 60.4 | 88.3   | 120.6 | 56.8     | 471.9 |       |
| 7     | 70             | 15             | 12             | 6              | 3.2       | 3.3   | 5.1  | 3.8    | 10.9 | 15.8   | 22.3  | 17.7     | 82.1  |       |
| 8     | 85             | 10             | 12             | 6              | 31.2      | 29.8  | 36.2 | 33.7   | 63.9 | 71     | 105.5 | 47.9     | 419.2 |       |
| 9     | 70             | 10             | 12             | 10             | 6.2       | 6     | 8.5  | 5.8    | 17   | 28.4   | 39.8  | 12.2     | 123.9 |       |
| 10    | 85             | 10             | 4              | 10             | 17        | 16.5  | 22.1 | 17     | 44.2 | 57.3   | 79.6  | 29.4     | 283.1 |       |
| 11    | 70             | 10             | 20             | 6              | 3.4       | 3.4   | 4.8  | 3.4    | 9.9  | 16.1   | 22.9  | 18.6     | 82.5  |       |
| 12    | 85             | 5              | 20             | 6              | 4.6       | 4.8   | 6.7  | 4.9    | 13.9 | 19.9   | 28.2  | 9.7      | 92.7  |       |
| 13    | 85             | 10             | 12             | 6              | 29.1      | 27.9  | 34.7 | 31     | 58.2 | 83.2   | 99    | 44.1     | 397.1 |       |
| 14    | 85             | 15             | 12             | 10             | 17.6      | 17.6  | 23.7 | 19.1   | 48.9 | 58.2   | 81.2  | 31.9     | 298.2 |       |
| 15    | 70             | 10             | 4              | 6              | 4.1       | 3.9   | 5.3  | 3.5    | 10.2 | 16.9   | 23.2  | 15.5     | 50    |       |
| 16    | 85             | 10             | 20             | 2              | 2.2       | 2.3   | 3.3  | 2.5    | 7.2  | 9.5    | 13.6  | 8.8      | 49.4  |       |
| 17    | 85             | 10             | 12             | 6              | 31        | 29.6  | 42.3 | 37.6   | 62.1 | 76.1   | 106.7 | 39.6     | 425.1 |       |
| 18    | 100            | 10             | 12             | 2              | 8.5       | 8.4   | 12   | 10.6   | 25.4 | 30.9   | 45.7  | 16.8     | 158.3 |       |
| 19    | 85             | 10             | 4              | 2              | 3.9       | 3.7   | 5.1  | 3.5    | 10   | 17.1   | 24.4  | 19.2     | 86.9  |       |
| 20    | 85             | 15             | 12             | 2              | 3.3       | 3.4   | 4.7  | 3.5    | 9.9  | 14.3   | 20.4  | 6.9      | 66.4  |       |
| 21    | 100            | 10             | 4              | 6              | 25.9      | 33.8  | 34   | 36.7   | 47.9 | 64.3   | 90.6  | 42.8     | 376   |       |
| 22    | 100            | 10             | 20             | 6              | 18        | 16.5  | 26   | 24.4   | 50.5 | 61.7   | 87.1  | 37.3     | 320   |       |
| 23    | 85             | 15             | 4              | 6              | 15        | 14.5  | 19.6 | 14.9   | 39   | 52.6   | 75.1  | 26.2     | 257.9 |       |
| 24    | 85             | 5              | 12             | 10             | 9.2       | 9.3   | 12.8 | 9.1    | 25.4 | 37.2   | 52    | 17.9     | 172.9 |       |
| 25    | 85             | 10             | 12             | 6              | 25.4      | 26    | 33.2 | 38.6   | 61   | 72     | 95    | 54.3     | 405.5 |       |
| 26    | 70             | 5              | 12             | 6              | 2.4       | 2.3   | 3.3  | 2.5    | 10.4 | 12.1   | 17.1  | 17       | 67.1  |       |
| 27    | 70             | 10             | 12             | 2              | 1.3       | 1.2   | 1.8  | 1.4    | 6.8  | 6.5    | 9.1   | 3.9      | 32    |       |
| 28    | 85             | 5              | 4              | 6              | 7         | 6.7   | 9.2  | 6.3    | 17.8 | 28.4   | 39.6  | 24       | 139   |       |
| 29    | 100            | 10             | 12             | 10             | 27.5      | 32.3  | 35   | 27.3   | 52.8 | 71.1   | 101   | 42.3     | 389.3 |       |

<sup>1</sup> temperature (°C); <sup>2</sup> time (min); <sup>3</sup> amount of catalyst (mg); <sup>4</sup> molar ratio of BCETS to total CPAHs

**Table S3**

**A comparison of the proposed method with different methods for detection of CPAHs.**

| Instrument method | Sample pretreatment  | Sample pretreatment procedure/time/step                                                                                                                                                                                                                                                                                                           | LOD           | RSD%  | Analytes                                                 | Samples                            | References |
|-------------------|----------------------|---------------------------------------------------------------------------------------------------------------------------------------------------------------------------------------------------------------------------------------------------------------------------------------------------------------------------------------------------|---------------|-------|----------------------------------------------------------|------------------------------------|------------|
| GC-MS             | SBSE <sup>1</sup>    | Adjusted the sample at pH 2, inserted the stir bars in sample, extracted for 240 min, rinsed stir bars with water, dried and inserted stir bars into a vial containing glass insert, desorbed the analytes for 30 min, removed the stir bar. > 7 steps, > 270 min.                                                                                | 20-46 ng/L    | 12-13 | 2,4-D,<br>2,4-DP,<br>MCPB                                | Water                              | 39         |
| GC-MS             | SPE <sup>2</sup>     | Conditioned SPE cartridge: filtered cartridge, washed with ethyl acetate, methanol and water; adjusted sample pH, passed through a SPE cartridge, dried cartridge, eluted, added the mixture of PCB-30 in ethyl acetate, then evaporated. > 10 steps, > 50 min.                                                                                   | 2-6 ng/mL     | 2.7-9 | 2,4-D,<br>2,4-DP,<br>2,4-DB,<br>MCPA,<br>MCPB            | surface and sewage water           | 4          |
| CE-UV             | SPE-EME <sup>3</sup> | SPE: conditioned solid phase, loaded water sample, rinsed extraction column, adsorption, eluted, evaporated, redissolved and transferred to a vial; EME: conditioned hollow fiber (the end was closed), added acceptor phase, placed electrode, electro-extraction, cut the sealed end of the hollow fiber, collected acceptor phase. > 15 steps, | 0.3-0.5 ng/mL | 7-7.4 | 2,4-DP,<br>MCPA,<br>MCPP                                 | Water                              | 7          |
| LC-UV             | SPE                  | The SPE column was cleaned for 15 min and conditioned for 10 min, then sample were passed through the sorbent, performed two washing steps, then eluted and evaporated. > 7 steps                                                                                                                                                                 | 3.5-6 ng/mL   | 1-5   | 2,4-D,<br>2,4-DP,<br>MCPA,<br>MCPP,<br>MCPB,<br>2,4,5-TP | Human urines samples               | 40         |
| LC-MS/MS          | LLE-SPE <sup>4</sup> | LLE: extracted with CH <sub>2</sub> Cl <sub>2</sub> , filtered through sodium sulfate, evaporated, reconstituted; SPE: Extraction cartridge was activated and washed, added reconstituted residues, washed the cartridges with NH <sub>4</sub> OH and methanol, then eluted the target analytes. > 12 steps, > 30 min                             | 0.4 ng/mL     | -     | 2,4-D                                                    | Paddy field water                  | 20         |
| LC-MS-MS          | SPE                  | Conditioned carbograph cartridge, fitted into filtering flask, liquids in a bottle connected to the sorbent cartridge were forced through the cartridge, washed cartridge with water, expelled remaining                                                                                                                                          | 1 ng/L        | 8     | 2,4-D,<br>MCPA                                           | River, draining and drinking water | 41         |

|          |                                                         |                                                                                                                                                                                                                                                                                                 |                 |            |                                                        |                                                        |            |  |  |
|----------|---------------------------------------------------------|-------------------------------------------------------------------------------------------------------------------------------------------------------------------------------------------------------------------------------------------------------------------------------------------------|-----------------|------------|--------------------------------------------------------|--------------------------------------------------------|------------|--|--|
|          |                                                         | for 10 min and washed with methanol, eluted, evaporated and redissolved. > 10 steps                                                                                                                                                                                                             |                 |            |                                                        |                                                        |            |  |  |
| LC-MS/MS | -                                                       | -                                                                                                                                                                                                                                                                                               | 0.01-1.3 ng/mL  | 3-15       | 2,4-D, MCPA, MCPP, Haloxyfop, Fluazifop                | Carrot, Apple                                          | 42         |  |  |
| HPLC-UV  | SPE                                                     | conditioned SPE cartridges with 3 steps, water samples were forced through the cartridge, then eluted with methanol and evaporated. > 6 steps                                                                                                                                                   | 3-5 ng/mL       | 3          | 2,4-D, 2,4-DP, MCPA, MCPP                              | River water                                            | 43         |  |  |
| HPLC-UV  | HF-LPME <sup>5</sup>                                    | Mounted the TT-extractor, pumped the organic solvent through the fiber channel, filled the fiber channel with organic solvent, pumped the aqueous sample around the fiber, washed the sample-phase channel with water and flushed the inside of the fiber with organic phase. > 35min, >6 steps | 0.5 ng/mL       | < 7        | CPA                                                    | River water                                            | 44         |  |  |
| HPLC-FLD | LLE                                                     | diluted samples with sodium chloride, added working solution, acidified the mixture and vortex, extracted with ethyl acetate/hexane, mixed vigorously for 5 min, centrifuged for 5 min, transferred the organic phase, evaporated > 25 min, > 9 steps                                           | 62.5 ng/mL      | -          | 2,4-D, MCPA                                            | Canine Plasma Urine                                    | 1          |  |  |
| HPLC-FLD | Derivatization with 6-Oxy(acetylpiperazine) Fluorescein | Derivatization process was employed at 60 °C for 1 h in the dark.                                                                                                                                                                                                                               | 4.43-14.2nM     | 1.05 -3.55 | 2,4-D                                                  | Cucumber, lettuce, tomato                              | 45         |  |  |
| HPLC-FLD | DLLME                                                   | Acidified the sample, rapidly injected a mixture of ACN and CH <sub>2</sub> Cl <sub>2</sub> , ultrasonic water bath, centrifuged, redissolved < 20 min, 5 steps                                                                                                                                 | 0.46-0.79 ng/mL | < 4.6      | 2,4-D, 2,4-DP, 2,4-DB, MCPA, MCPP, MCPB, CPA, Diclofop | Rice, Millet, Carrot, Pepper, Tomato, Potato, Soybean, | This study |  |  |

<sup>1</sup> Stir-bar Sorptive Extraction; <sup>2</sup> Solid-phase Extraction; <sup>3</sup> Solid Phase Extraction Combined with Electro Membrane Extraction;

<sup>4</sup> Liquid-Liquid and Solid-phase Extraction; <sup>5</sup> Hollow Fiber Liquid-Phase Microextraction.

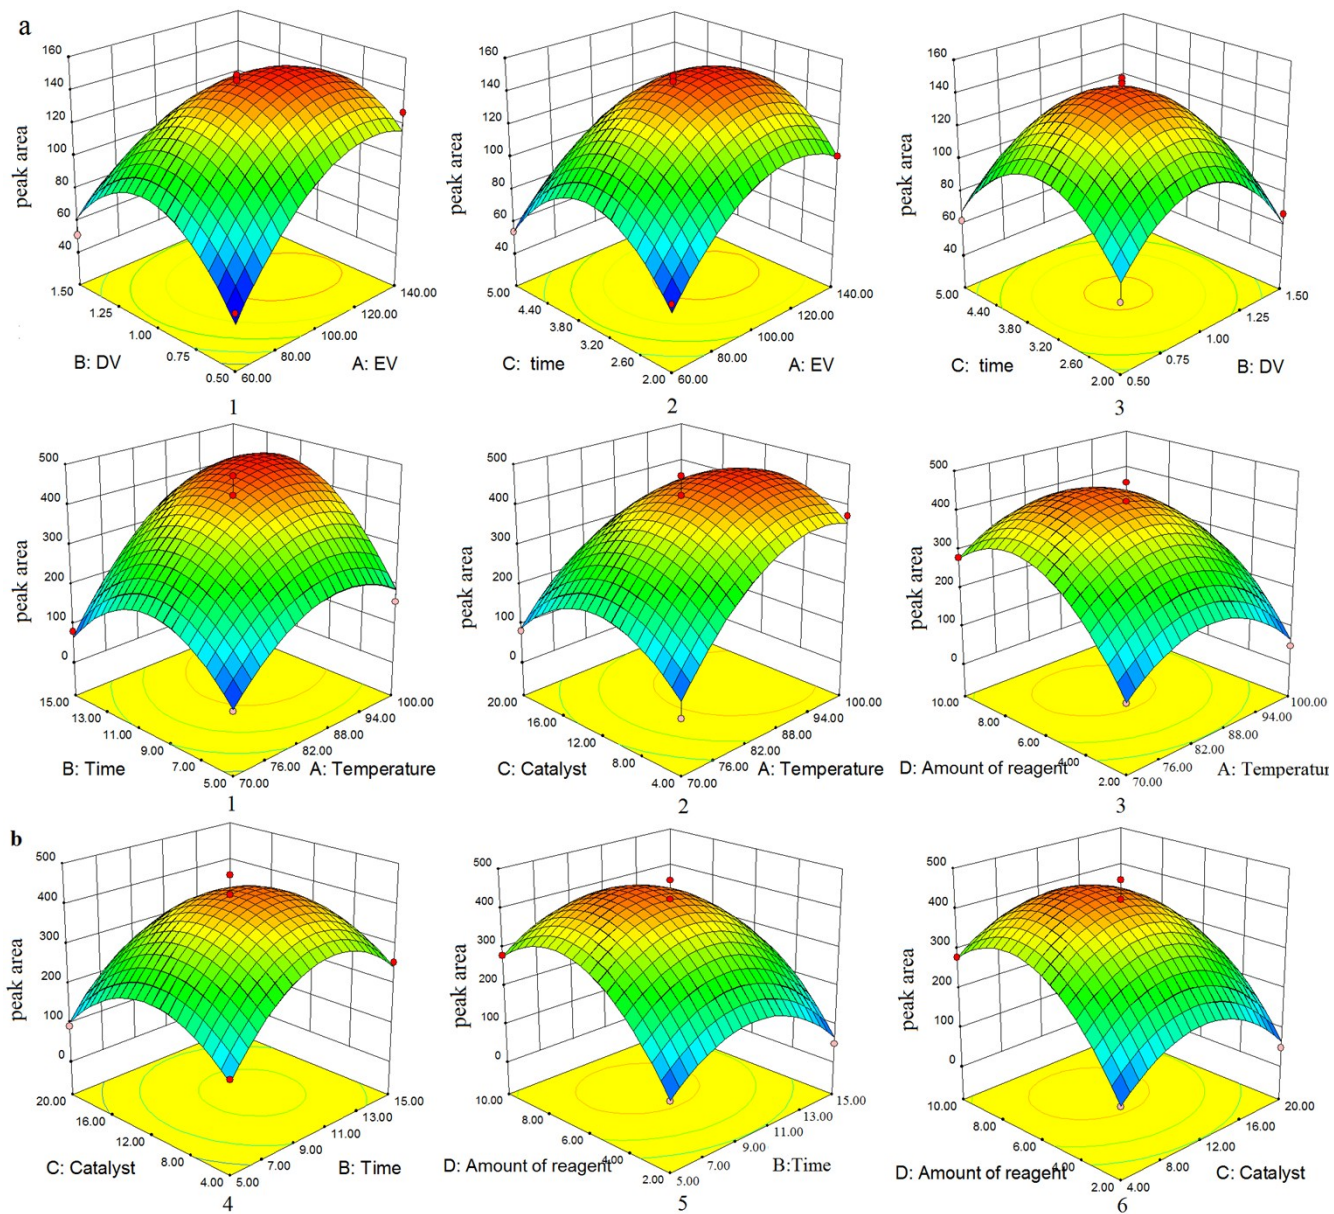

Figure S1. 3D surface for the interaction effects of the DLLME parameters a(1-3) and CPAHs derivatization b(1-6) using the BBD obtained by plotting. EV: extraction solvent volume; DV: disperser solvent volume.
